# Supplementary material for: Gas-phase C60Hn+q (n = 0–4, q = 0,1) fullerenes and fulleranes: spectroscopic simulations shed light on cosmic molecular structures
Source: Royal Society of Chemistry journal article supplement (doi:10.1039/d3cp03254j), 2023-01-01
Supplement: d3cp03254j1.pdf [file d3cp03254j1.pdf]

## Electronic Supporting Information

# Gas-phase $C_{60}H_n^{+q}$ ( $n = 0-4$ , $q = 0,1$ ) Fullerenes and Fulleranes: Spectroscopic Simulations Shed Light on Cosmic Molecular Structures

Ricardo R. Oliveira<sup>a\*</sup>, Germán Molpeceres<sup>b\*</sup>, Ricardo Montserrat<sup>a</sup>, Felipe Fantuzzi<sup>c</sup>,  
Alexandre B. Rocha<sup>a</sup> and Johannes Kästner<sup>d</sup>

<sup>a</sup> *Chemistry Institute, Federal University of Rio de Janeiro, Rio de Janeiro, Brazil*

*\* e-mail: rrodrigues.iq@gmail.com*

<sup>b</sup> *Department of Astronomy, Graduate School of Science, The University of Tokyo, Tokyo 113 0033, Japan*

*\* e-mail: molpeceres@astron.s.u-tokyo.ac.jp*

<sup>c</sup> *School of Chemistry and Forensic Science, University of Kent, Canterbury CT2 7NH, UK.*

<sup>d</sup> *Institute for Theoretical Chemistry, University of Stuttgart, Stuttgart, Germany*

## Contents

|                                                                                                                 |            |
|-----------------------------------------------------------------------------------------------------------------|------------|
| <b>S1 Molecular structures and relative enthalpies</b>                                                          | <b>S2</b>  |
| <b>S2 Infrared spectra: C—C region</b>                                                                          | <b>S9</b>  |
| <b>S3 Electronic absorption spectra of <math>C_{60}</math>, <math>C_{60}H</math> and <math>C_{60}H^+</math></b> | <b>S10</b> |
| <b>S4 Infrared spectra: C—H region</b>                                                                          | <b>S11</b> |
| <b>S5 Electronic absorption spectra of <math>C_{60}H_2</math> and <math>C_{60}H_4</math></b>                    | <b>S16</b> |
| <b>S6 Electronic transitions</b>                                                                                | <b>S17</b> |
| <b>S7 Ionization potentials</b>                                                                                 | <b>S25</b> |
| <b>S8 Property trends</b>                                                                                       | <b>S26</b> |

## S1 Molecular structures and relative enthalpies

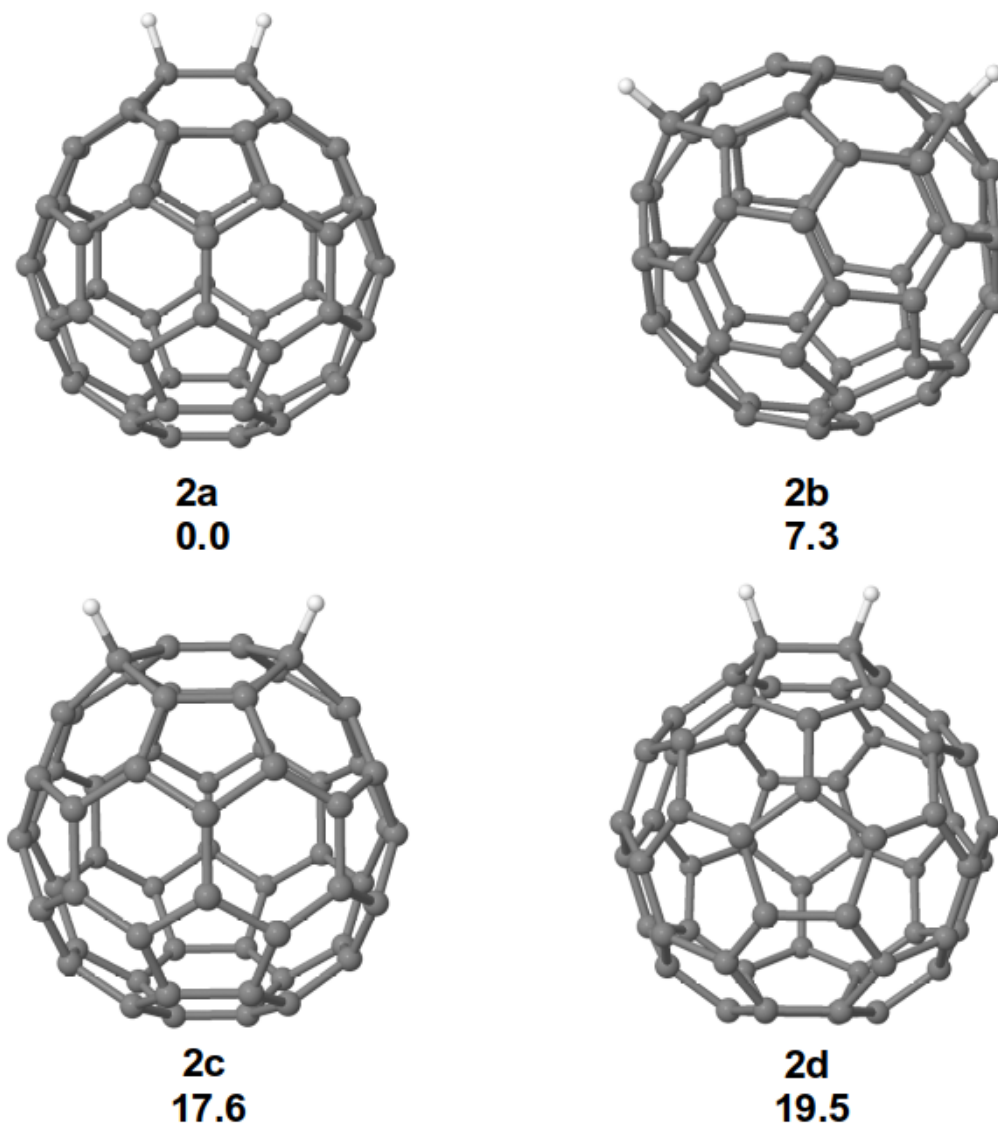

**Figure S1** Molecular structures of  $C_{60}H_2$  obtained at B3LYP-D3/def2-TZVP level. All energies are in  $\text{kcal mol}^{-1}$  units.

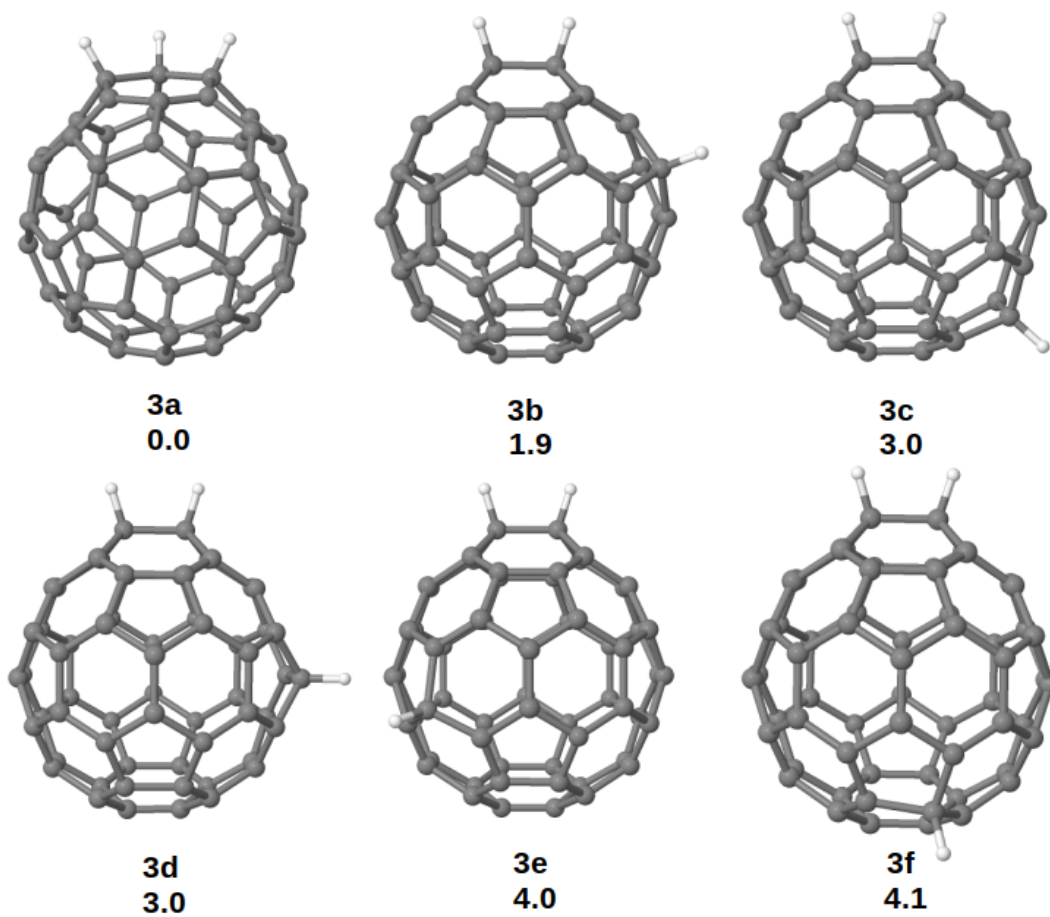

**Figure S2** Molecular structures of  $C_{60}H_3$  obtained at B3LYP-D3/def2-TZVP level. All energies are in  $\text{kcal mol}^{-1}$  units.

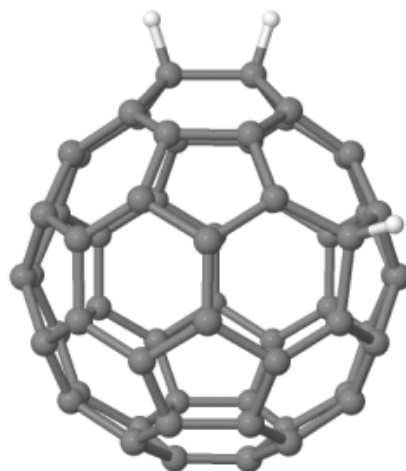

**3d-c (3i<sup>+</sup>)**  
**2.4**

**Figure S3** Molecular structure of 3i<sup>+</sup> isomer of C<sub>60</sub>H<sub>3</sub><sup>+</sup> obtained at B3LYP-D3/def2-TZVP level. All energies are in kcal mol<sup>-1</sup> units.

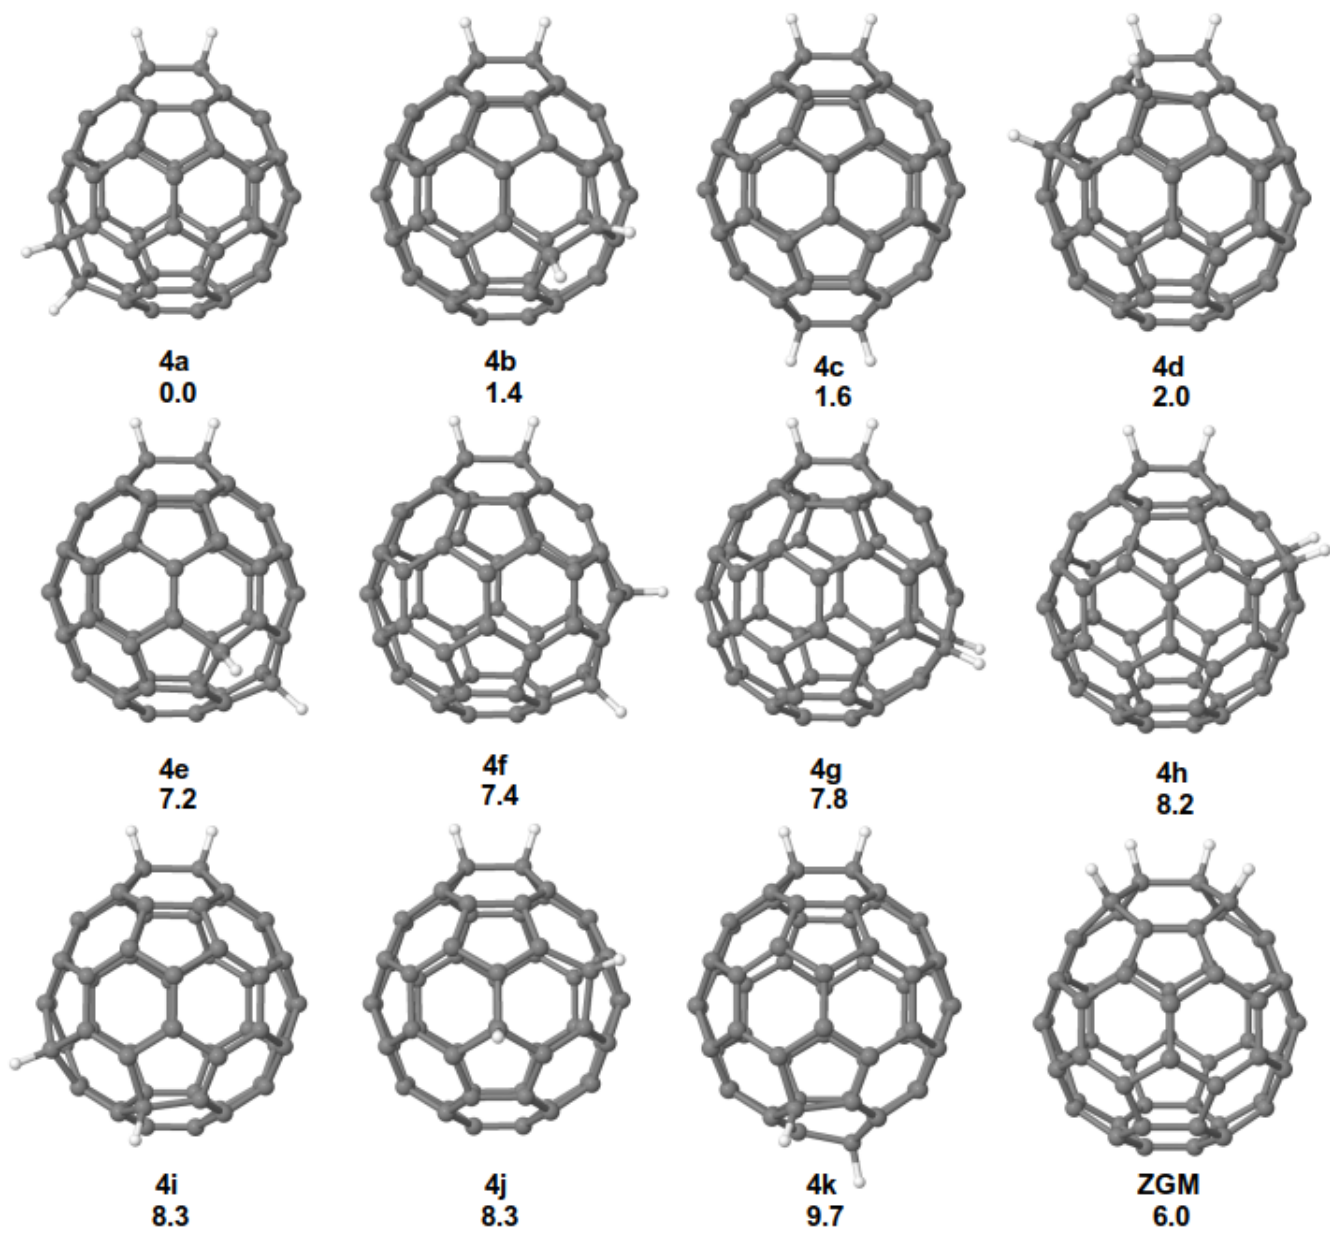

**Figure S4** Molecular structures of  $C_{60}H_4$  obtained at B3LYP-D3/def2-TZVP level. All energies are in kcal mol<sup>-1</sup> units.

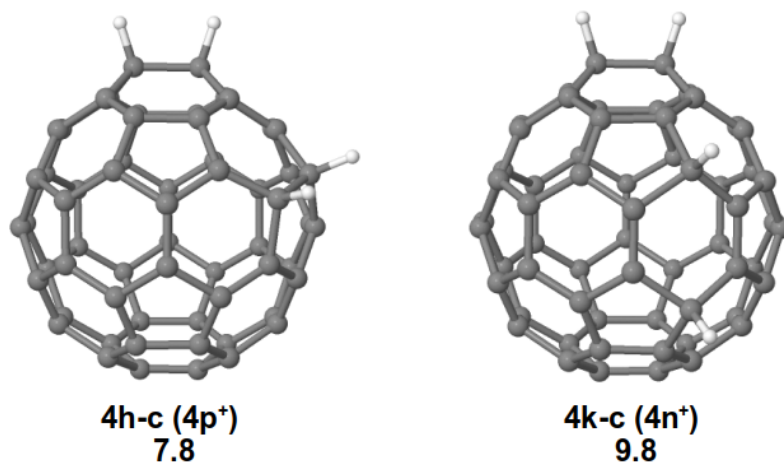

**Figure S5** Molecular structure of 4p<sup>+</sup> and 4n<sup>+</sup> isomer of C<sub>60</sub>H<sub>4</sub><sup>+</sup> obtained at B3LYP-D3/def2-TZVP level. All energies are in kcal mol<sup>-1</sup> units.

**Table S1** Relative enthalpies of C<sub>60</sub>H<sub>2</sub> and C<sub>60</sub>H<sub>2</sub><sup>+</sup> species obtained at B3LYP-D3/def2-TZVP level.

| Specie | Enthalpy (kcal mol <sup>-1</sup> ) | Specie                  | Enthalpy (kcal mol <sup>-1</sup> ) |
|--------|------------------------------------|-------------------------|------------------------------------|
| 2a     | 0.00                               | 2a-c (2a <sup>+</sup> ) | 0.00                               |
| 2b     | 7.29                               | 2b-c (2b <sup>+</sup> ) | 7.52                               |
| 2c     | 17.64                              | 2c-c (2d <sup>+</sup> ) | 9.95                               |
| 2d     | 19.49                              | 2d-c (2c <sup>+</sup> ) | 10.01                              |
| 2e     | 22.89                              | 2e-c (2f <sup>+</sup> ) | 11.81                              |
| 2f     | 25.29                              | 2f-c (2e <sup>+</sup> ) | 12.12                              |
| 2g     | 28.81                              | 2g-c (2g <sup>+</sup> ) | 14.54                              |
| 2h     | 30.09                              | 2h-c (2i <sup>+</sup> ) | 14.72                              |
| 2i     | 33.09                              | 2i-c (2h <sup>+</sup> ) | 15.08                              |
| 2j     | 36.13                              | 2j-c (2j <sup>+</sup> ) | 16.28                              |
| 2k     | 73.32                              | 2k-c (2k <sup>+</sup> ) | 61.14                              |

**Table S2** Relative enthalpies of  $C_{60}H_3$  and  $C_{60}H_3^+$  species obtained at B3LYP-D3/def2-TZVP level.

| Specie | Enthalpy (kcal mol <sup>-1</sup> ) | Specie                  | Enthalpy (kcal mol <sup>-1</sup> ) |
|--------|------------------------------------|-------------------------|------------------------------------|
| 3a     | 0.00                               | 3a-c (3b <sup>+</sup> ) | 0.00                               |
| 3b     | 1.88                               | 3b-c (3a <sup>+</sup> ) | 0.43                               |
| 3c     | 2.95                               | 3c-c (3d <sup>+</sup> ) | 1.24                               |
| 3d     | 3.01                               | 3d-c (3i <sup>+</sup> ) | 2.14                               |
| 3e     | 3.98                               | 3e-c (3c <sup>+</sup> ) | 2.40                               |
| 3f     | 4.14                               | 3f-c (3e <sup>+</sup> ) | 2.61                               |
| 3g     | 5.00                               | 3g-c (3f <sup>+</sup> ) | 3.29                               |
| 3h     | 5.18                               | 3h-c (3h <sup>+</sup> ) | 5.14                               |
| 3i     | 5.36                               | 3i-c (3g <sup>+</sup> ) | 6.04                               |
| 3j     | 6.50                               | 3j-c (3j <sup>+</sup> ) | 7.23                               |
| 3k     | 9.23                               | 3k-c (3k <sup>+</sup> ) | 7.30                               |

**Table S3** Relative enthalpies of  $C_{60}H_4$  and  $C_{60}H_4^+$  species obtained at B3LYP-D3/def2-TZVP level.

| Specie | Enthalpy (kcal mol <sup>-1</sup> ) | Specie                  | Enthalpy (kcal mol <sup>-1</sup> ) |
|--------|------------------------------------|-------------------------|------------------------------------|
| 4a     | 0.00                               | 4a-c (4a <sup>+</sup> ) | 0.00                               |
| 4b     | 1.41                               | 4b-c (4b <sup>+</sup> ) | 0.42                               |
| 4c     | 1.57                               | 4c-c (4c <sup>+</sup> ) | 2.22                               |
| 4d     | 2.04                               | 4d-c (4d <sup>+</sup> ) | 3.54                               |
| 4e     | 7.23                               | 4e-c (4h <sup>+</sup> ) | 4.03                               |
| 4f     | 7.35                               | 4f-c (4j <sup>+</sup> ) | 6.59                               |
| 4g     | 7.81                               | 4g-c (4i <sup>+</sup> ) | 7.70                               |
| 4h     | 8.23                               | 4h-c (4p <sup>+</sup> ) | 7.75                               |
| 4i     | 8.29                               | 4i-c (4e <sup>+</sup> ) | 8.68                               |
| 4j     | 8.30                               | 4j-c (4f <sup>+</sup> ) | 8.72                               |
| 4k     | 9.69                               | 4k-c (4n <sup>+</sup> ) | 9.03                               |
| ZGM    | 6.00                               | -                       | -                                  |



## S2 Infrared spectra: C—C region

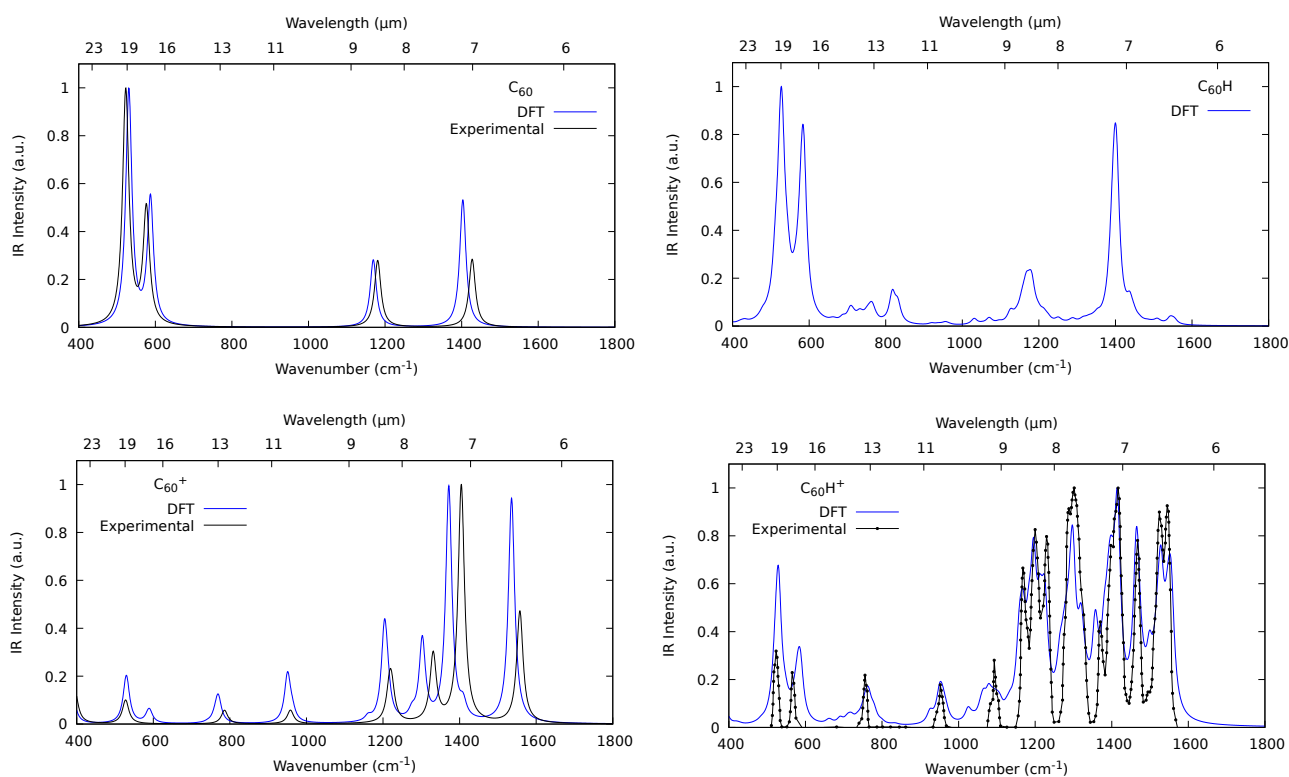

**Figure S6** Simulated infrared spectra of C<sub>60</sub>, C<sub>60</sub><sup>+</sup>, C<sub>60</sub>H and C<sub>60</sub>H<sup>+</sup> at B3LYP-D3/def2-TZVP level of theory. Experimental results for C<sub>60</sub>, C<sub>60</sub><sup>+</sup> and C<sub>60</sub>H<sup>+</sup> were obtained by Yamanoto and co-workers,<sup>1</sup> Strelnikov and co-workers,<sup>2</sup> and Palotás and co-workers<sup>3</sup> respectively.

S3 Electronic absorption spectra of  $C_{60}$ ,  $C_{60}H$  and  $C_{60}H^+$ 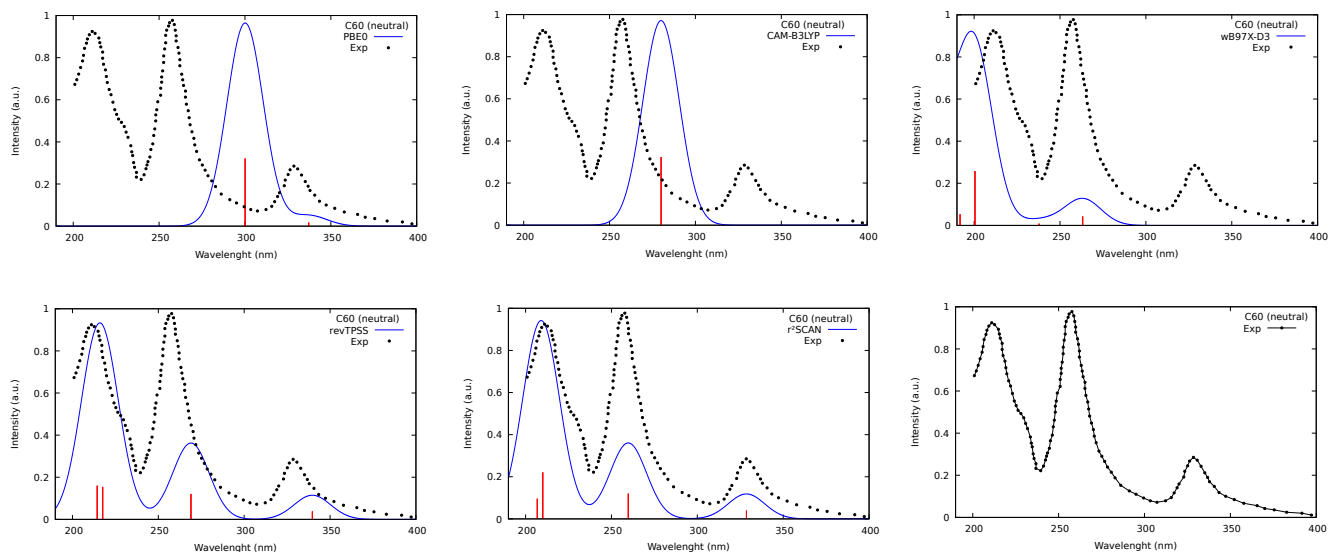

**Figure S7** Simulated electronic absorption spectra of  $C_{60}$  applying several functionals combined with def2-TZVP basis set. The experimental result for  $C_{60}$  was obtained by Leach and co-workers.<sup>4</sup>

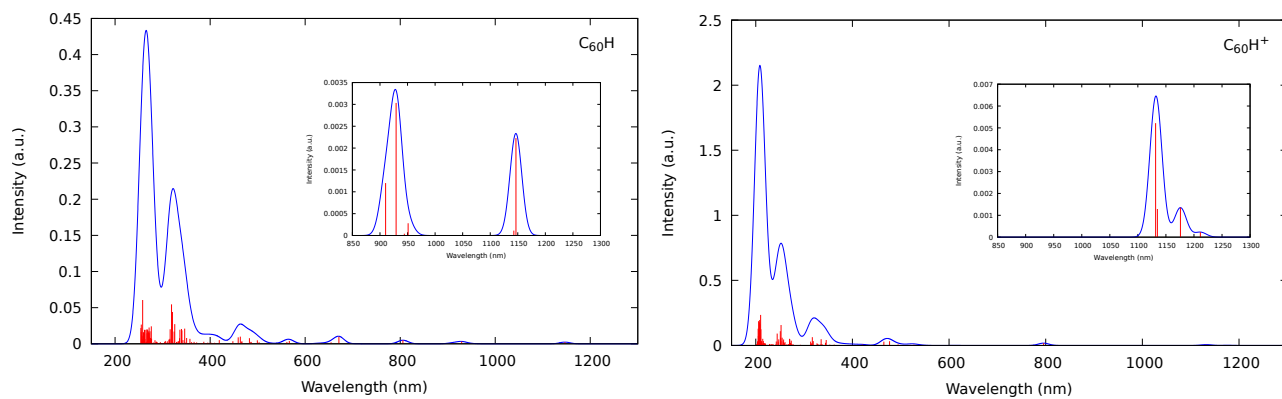

**Figure S8** Simulated electronic absorption spectra of  $C_{60}H$  and  $C_{60}H^+$ .

**S4 Infrared spectra: C—H region**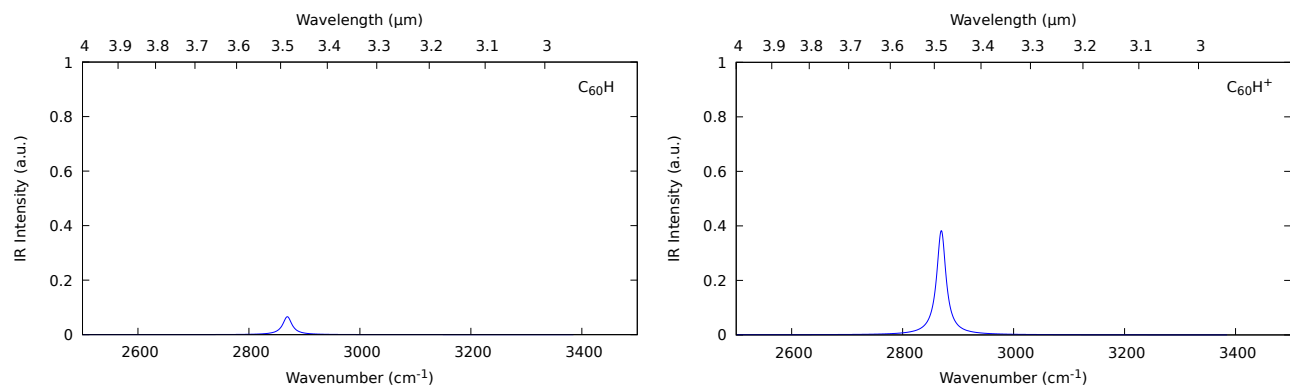

**Figure S9** Simulated infrared spectra (C—H region) of  $C_{60}H$  and  $C_{60}H^+$  at B3LYP-D3/def2-TZVP level of theory.

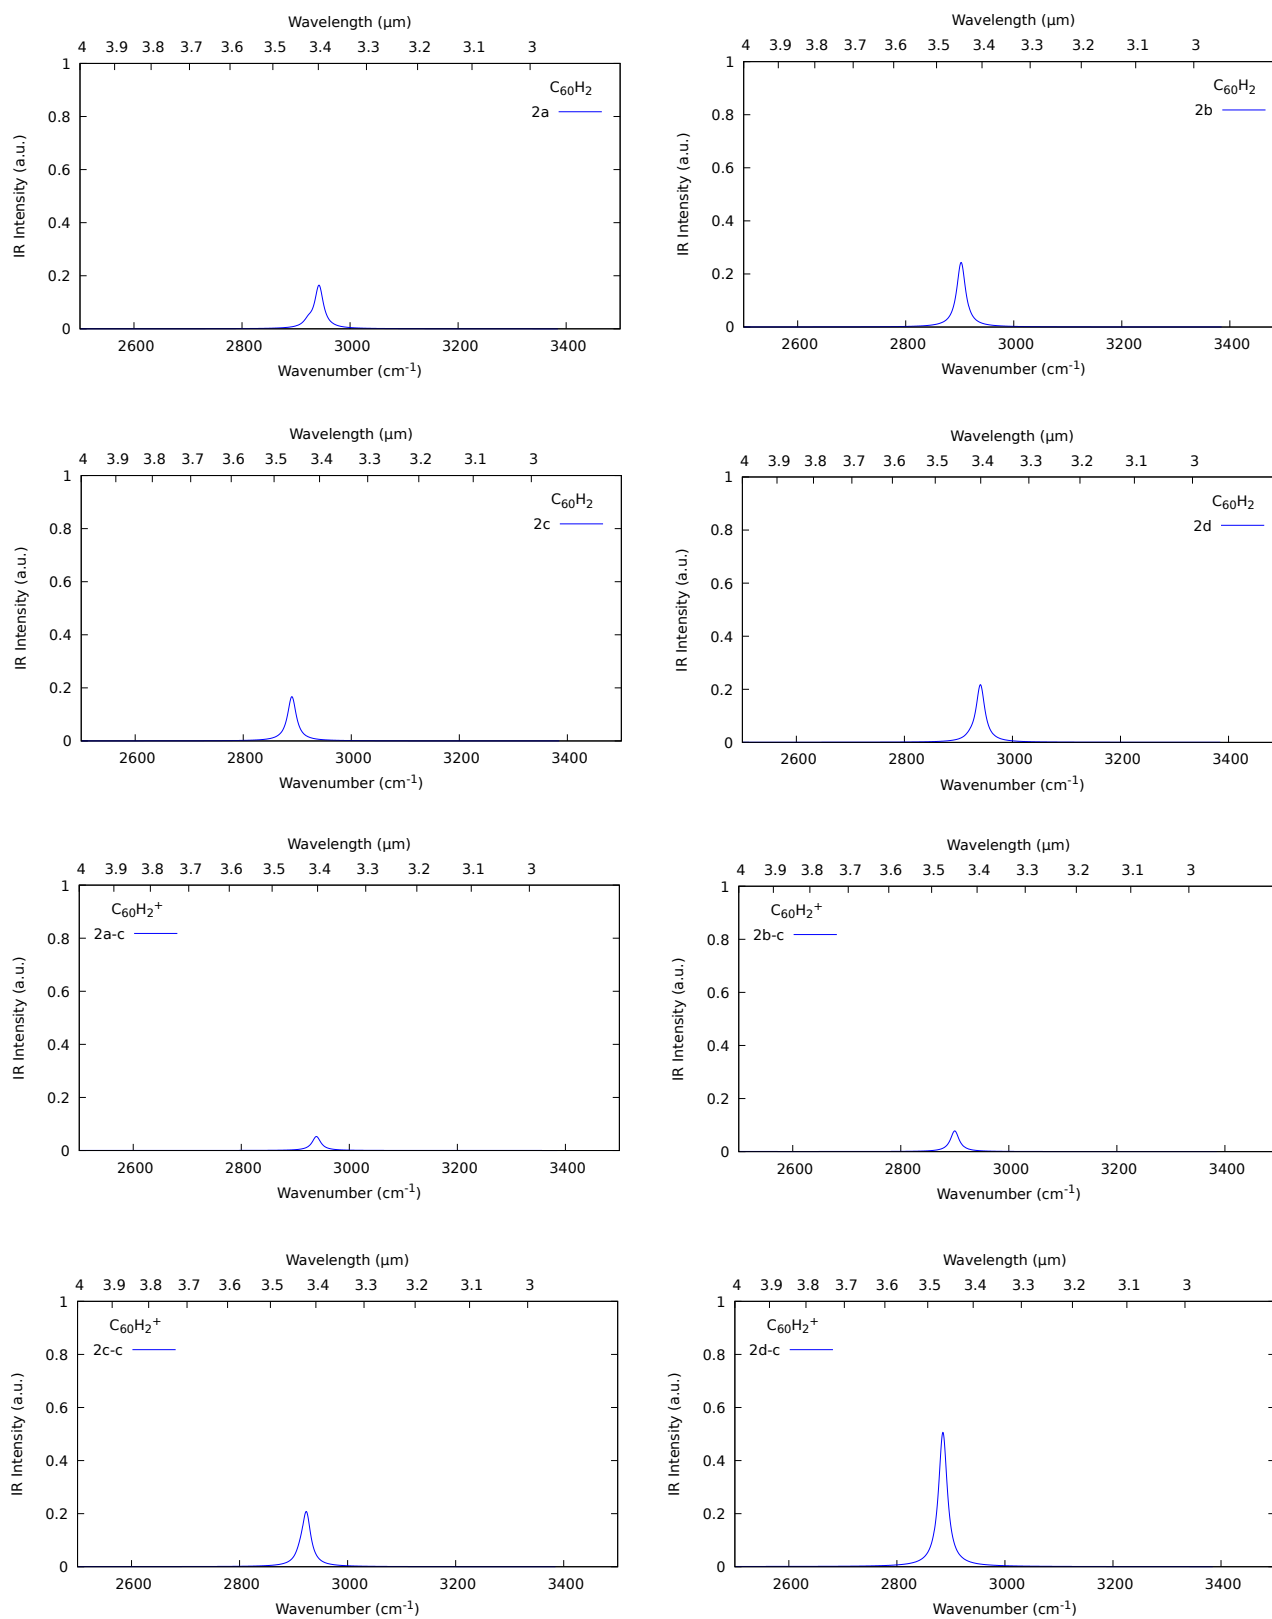

**Figure S10** Simulated infrared spectra (C—H region) of C<sub>60</sub>H<sub>2</sub> and C<sub>60</sub>H<sub>2</sub><sup>+</sup> isomers at B3LYP-D3/def2-TZVP level of theory.

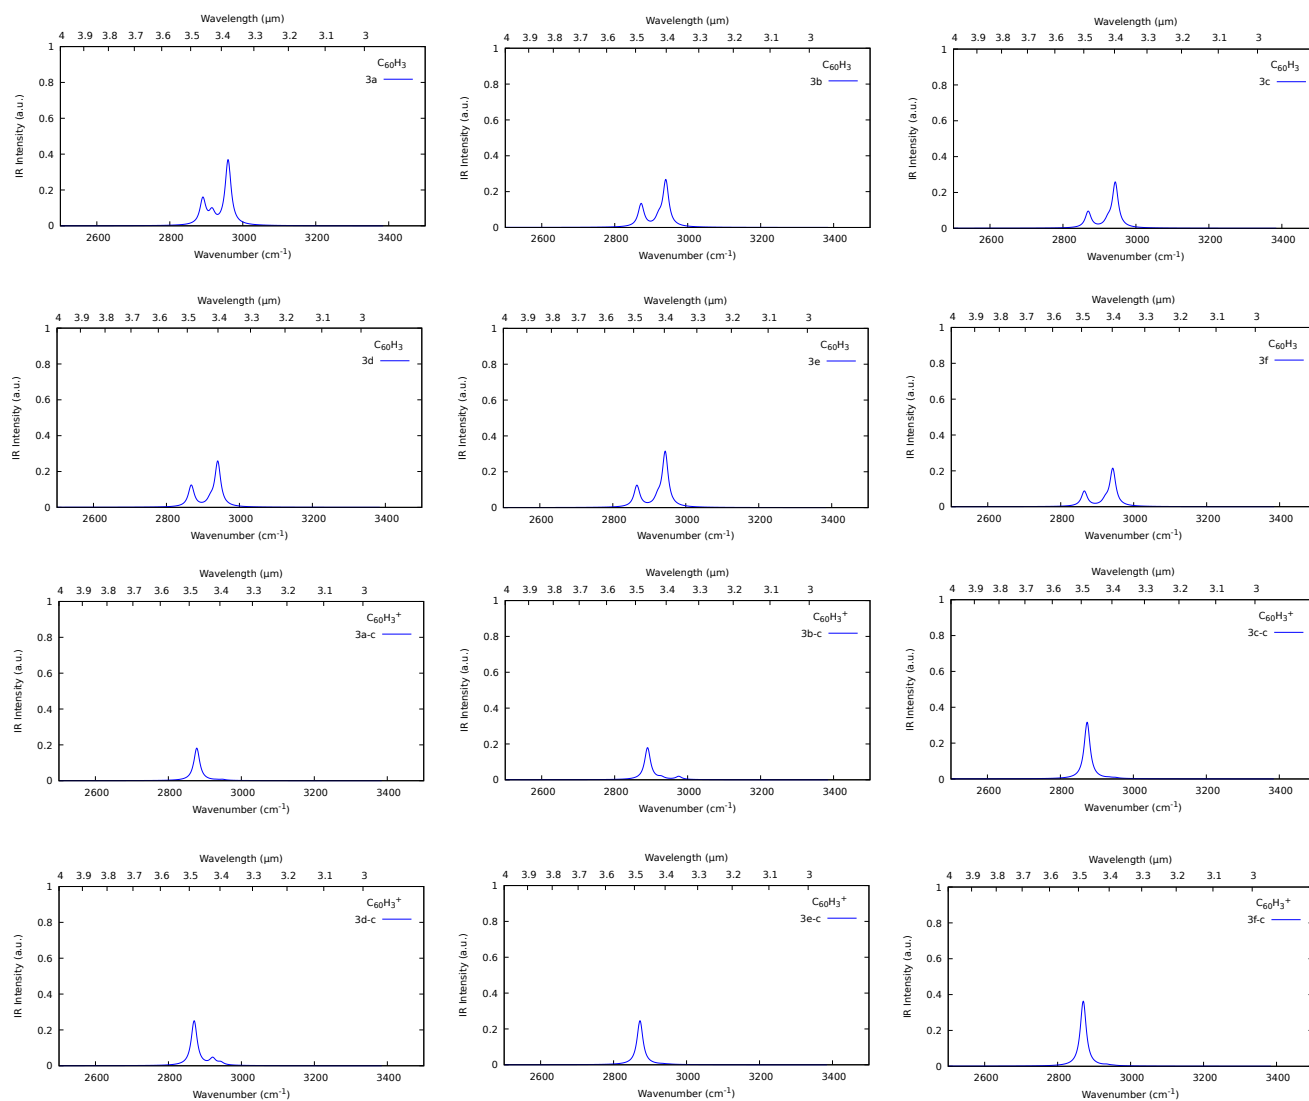

**Figure S11** Simulated infrared spectra (C—H region) of  $C_{60}H_3$  and  $C_{60}H_3^+$  isomers at B3LYP-D3/def2-TZVP level of theory.

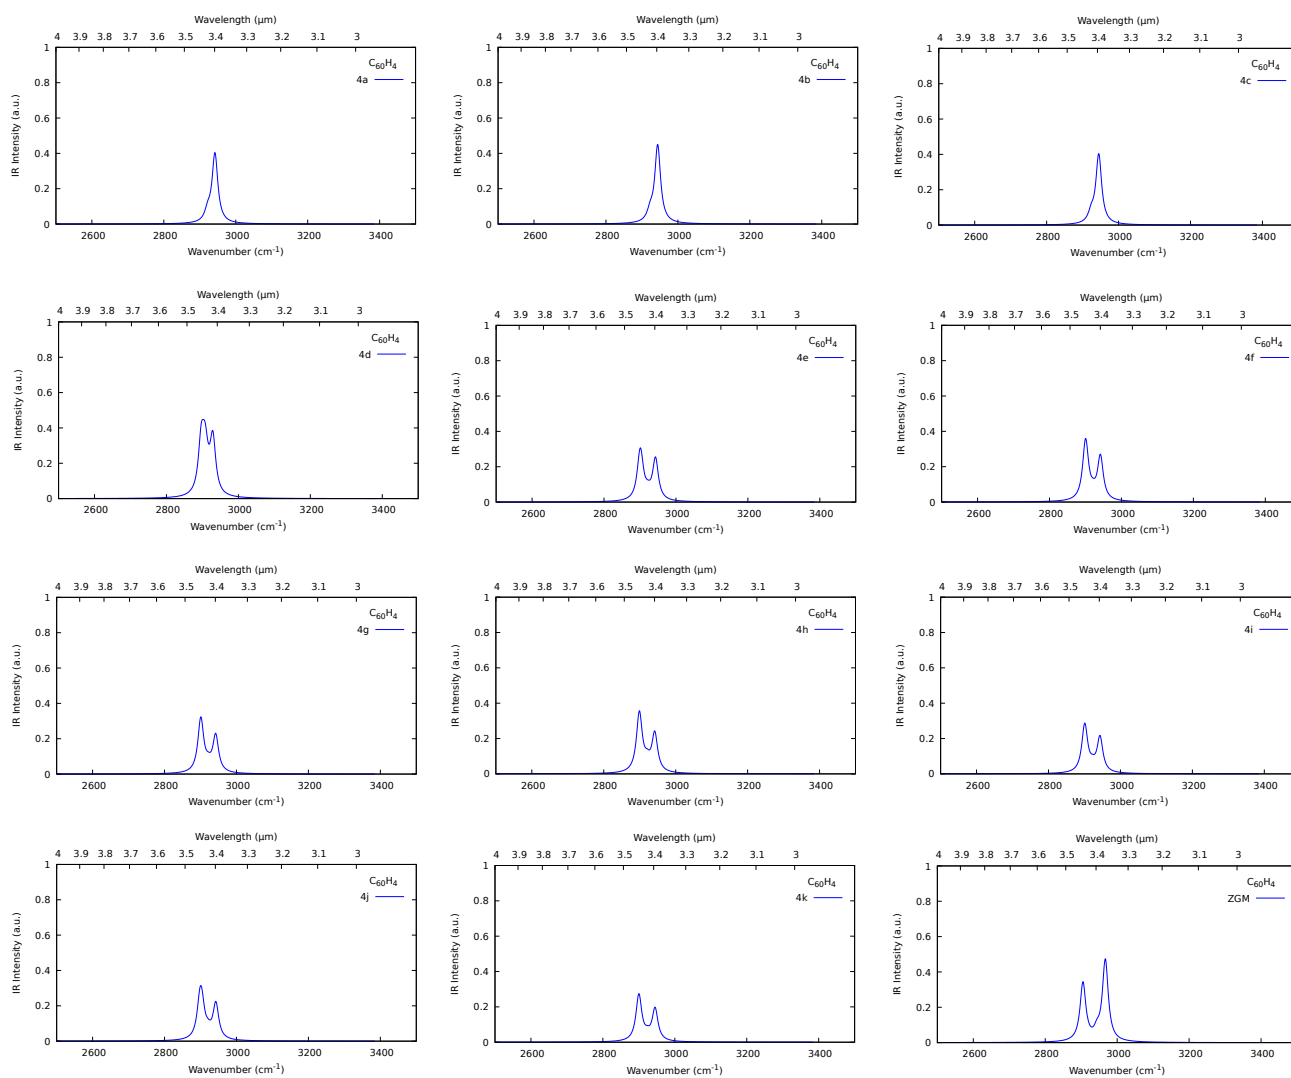

**Figure S12** Simulated infrared spectra (C—H region) of  $C_{60}H_4$  isomers at B3LYP-D3/def2-TZVP level of theory.

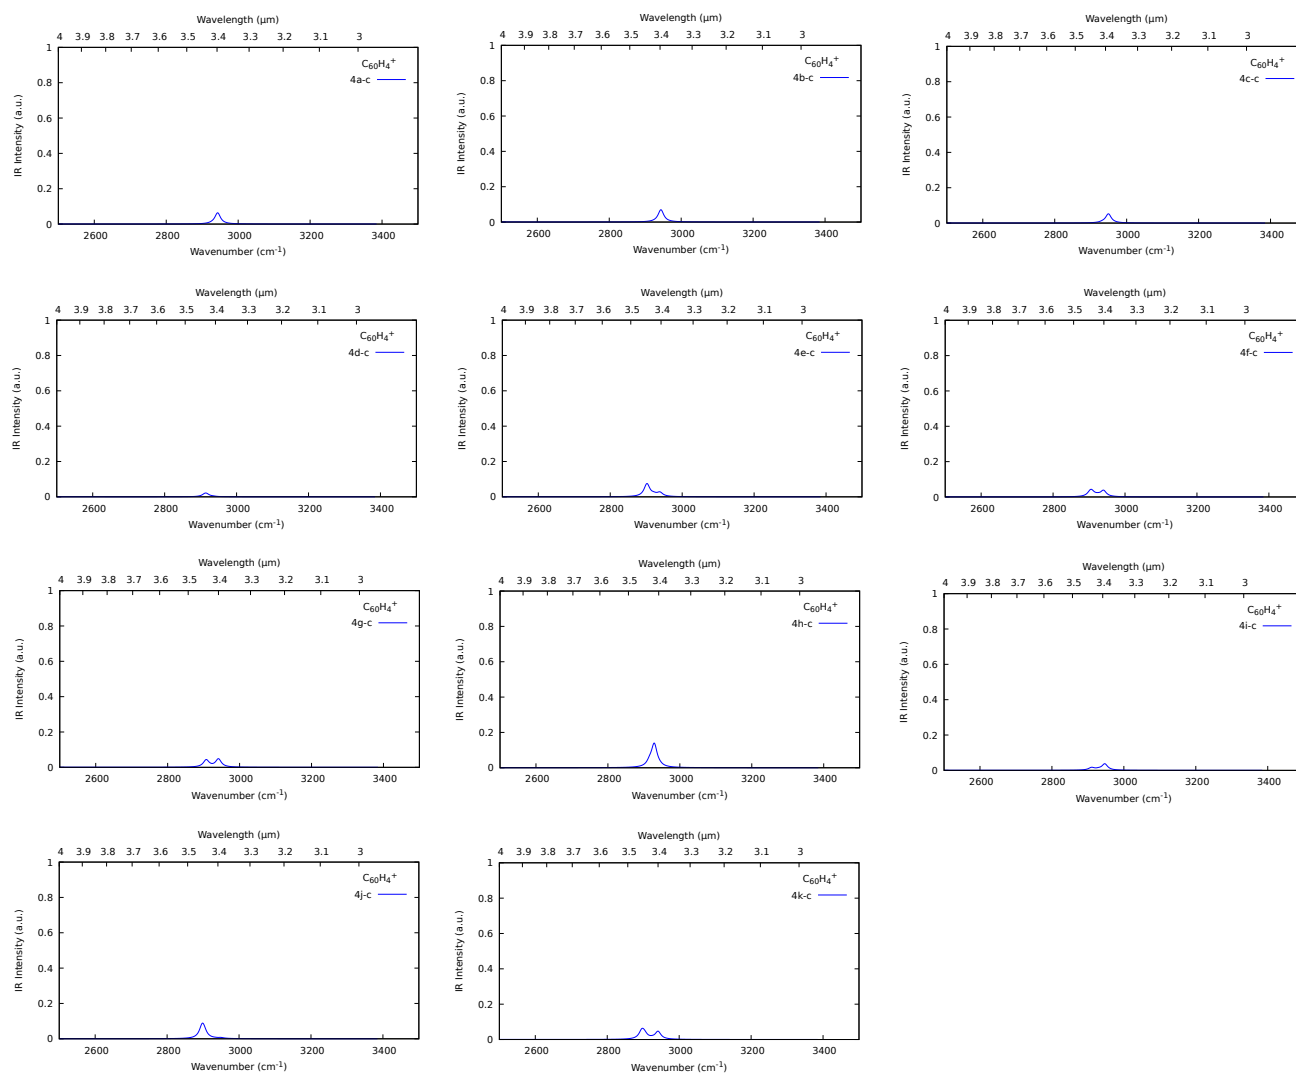

**Figure S13** Simulated infrared spectra (C—H region) of  $C_{60}H_4^+$  isomers at B3LYP-D3/def2-TZVP level of theory.

**S5 Electronic absorption spectra of  $C_{60}H_2$  and  $C_{60}H_4$** 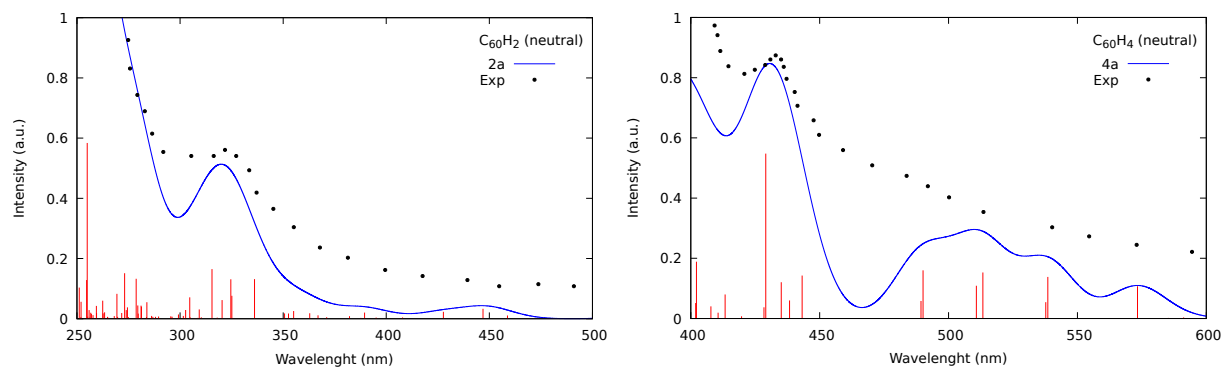

**Figure S14** Simulated electronic absorption spectra of  $C_{60}H_2$  (left) and  $C_{60}H_4$  (right) applying  $r^2$ SCAN functional combined with def2-TZVP basis set. The experimental result was obtained by Henderson and Cahill,<sup>5</sup> and Bensasson and co-workers.<sup>6</sup>



## S6 Electronic transitions

**Table S4** Wavelength (in nm) and optical oscillator strength (OOS) of main electronic transitions of  $C_{60}$  and  $C_{60}^+$  species obtained at r<sup>2</sup>SCAN/def2-TZVP level. In parentheses are the transition energy values in eV.

| $C_{60}$               |                           |        |
|------------------------|---------------------------|--------|
| Wavelength (this work) | Wavelength                | OOS    |
| 328.6 (3.77)           | 328.4 <sup>a</sup> (3.78) | 0.1039 |
| 259.8 (4.77)           | 256.6 <sup>a</sup> (4.83) | 0.3162 |
| 210.0 (5.90)           | 211.0 <sup>a</sup> (5.88) | 0.5810 |
| $C_{60}^+$             |                           |        |
| Wavelength (this work) | Wavelength                | OOS    |
| 895.0 (1.39)           | 879.3 <sup>b</sup> (1.41) | 0.0057 |
|                        | 892.0 <sup>c</sup> (1.39) |        |
| 764.2 (1.62)           | 784.7 <sup>b</sup> (1.58) | 0.0430 |
|                        | 801.0 <sup>c</sup> (1.55) |        |

<sup>a</sup> Experimental results from Leach and co-workers.<sup>4</sup>

<sup>b</sup> Theoretical results from Lykhin and co-workers.<sup>7</sup>

<sup>c</sup> Theoretical results from Soler and co-workers.<sup>8</sup>

**Table S5** Wavelength (nm), energy (eV) and optical oscillator strength (OOS) of the first electronic transitions of  $C_{60}H$  ( $q = 0$ ) and  $C_{60}H^+$  ( $q = +1$ ) species obtained at  $r^2SCAN/def2-TZVP$  level.

| Specie      | E (nm) | E (eV) | OOS    |
|-------------|--------|--------|--------|
| $C_{60}H$   | 1147   | 1.08   | 0.0022 |
|             | 1143   | 1.08   | 0.0001 |
|             | 951    | 1.30   | 0.0003 |
|             | 944    | 1.31   | 0.0000 |
|             | 929    | 1.33   | 0.0030 |
|             | 910    | 1.36   | 0.0012 |
| $C_{60}H^+$ | 1211   | 1.02   | 0.0002 |
|             | 1176   | 1.05   | 0.0013 |
|             | 1135   | 1.09   | 0.0013 |
|             | 1132   | 1.10   | 0.0052 |

**Table S6** Wavelength (nm), energy (eV) and optical oscillator strength (OOS) of the first electronic transitions of  $C_{60}H_2$  ( $q = 0$ ) and  $C_{60}H_2^+$  ( $q = +1$ ) isomers obtained at  $r^2SCAN/def2-TZVP$  level. Only transitions with  $\lambda > 900$  nm are shown.

| $q = 0$   |        |        |     | $q = +1$    |        |        |        |
|-----------|--------|--------|-----|-------------|--------|--------|--------|
| Specie    | E (nm) | E (eV) | OOS | Specie      | E (nm) | E (eV) | OOS    |
|           |        |        |     |             | 3873   | 0.32   | 0.0000 |
|           |        |        |     |             | 3832   | 0.32   | 0.0001 |
| <b>2a</b> | -      | -      | -   | <b>2a-c</b> | 3144   | 0.39   | 0.0006 |
|           |        |        |     |             | 1778   | 0.70   | 0.0020 |
|           |        |        |     |             | 994    | 1.25   | 0.0188 |
|           |        |        |     |             | 4429   | 0.28   | 0.0001 |
|           |        |        |     |             | 3903   | 0.32   | 0.0005 |
| <b>2b</b> | -      | -      | -   | <b>2b-c</b> | 3574   | 0.35   | 0.0013 |
|           |        |        |     |             | 1576   | 0.79   | 0.0012 |
|           |        |        |     |             | 1533   | 0.81   | 0.0085 |

| Continuation |        |        |        |             |        |        |        |
|--------------|--------|--------|--------|-------------|--------|--------|--------|
| $q = 0$      |        |        |        | $q = +1$    |        |        |        |
| Specie       | E (nm) | E (eV) | OOS    | Specie      | E (nm) | E (eV) | OOS    |
|              | 963    | 1.29   | 0.0064 |             | 1724   | 0.72   | 0.0019 |
|              |        |        |        |             | 1700   | 0.73   | 0.0013 |
|              |        |        |        |             | 1687   | 0.73   | 0.0007 |
|              |        |        |        |             | 1621   | 0.76   | 0.0005 |
| <b>2c</b>    |        |        |        | <b>2c-c</b> | 1144   | 1.08   | 0.0033 |
|              |        |        |        |             | 1082   | 1.15   | 0.0004 |
|              |        |        |        |             | 1074   | 1.15   | 0.0004 |
|              |        |        |        |             | 1032   | 1.20   | 0.0001 |
|              |        |        |        |             | 921    | 1.35   | 0.0000 |
|              | 1140   | 1.09   | 0.0043 |             | 1917   | 0.65   | 0.0020 |
|              | 934    | 1.33   | 0.0022 |             | 1865   | 0.66   | 0.0001 |
| <b>2d</b>    |        |        |        | <b>2d-c</b> | 1783   | 0.70   | 0.0018 |
|              |        |        |        |             | 1135   | 1.09   | 0.0011 |
|              |        |        |        |             | 1110   | 1.12   | 0.0090 |
|              |        |        |        |             | 1101   | 1.13   | 0.0056 |

**Table S7** Wavelength (nm), energy (eV) and optical oscillator strength (OOS) of the first electronic transitions of  $C_{60}H_3$  ( $q = 0$ ) and  $C_{60}H_3^+$  ( $q = +1$ ) isomers obtained at  $r^2SCAN/def2-TZVP$  level.

| $q = 0$   |        |        |        | $q = +1$    |        |        |        |
|-----------|--------|--------|--------|-------------|--------|--------|--------|
| Specie    | E (nm) | E (eV) | OOS    | Specie      | E (nm) | E (eV) | OOS    |
| <b>3a</b> | 1155   | 1.07   | 0.0018 | <b>3a-c</b> | 1272   | 0.97   | 0.0073 |
|           | 1020   | 1.22   | 0.0009 |             | 1168   | 1.06   | 0.0000 |
|           | 958    | 1.29   | 0.0010 |             | 1103   | 1.12   | 0.0039 |
|           | 914    | 1.36   | 0.0002 |             |        |        |        |
| <b>3b</b> | 1176   | 1.05   | 0.0008 | <b>3b-c</b> | 1482   | 0.84   | 0.0012 |
|           | 1041   | 1.19   | 0.0032 |             | 1188   | 1.04   | 0.0001 |
|           | 973    | 1.27   | 0.0000 |             | 1169   | 1.06   | 0.0039 |
|           | 939    | 1.32   | 0.0010 |             | 957    | 1.30   | 0.0020 |
|           | 919    | 1.35   | 0.0042 |             |        |        |        |
| <b>3c</b> | 1150   | 1.078  | 0.0009 | <b>3c-c</b> | 1155   | 1.07   | 0.0055 |
|           | 1047   | 1.185  | 0.0023 |             | 1089   | 1.14   | 0.0020 |
|           | 983    | 1.261  | 0.0015 |             | 1081   | 1.15   | 0.0027 |
|           | 950    | 1.306  | 0.0006 |             |        |        |        |
|           | 930    | 1.333  | 0.0021 |             |        |        |        |
| <b>3d</b> | 1252   | 0.990  | 0.0004 | <b>3d-c</b> | 1218   | 1.02   | 0.0032 |
|           | 950    | 1.305  | 0.0006 |             | 1049   | 1.18   | 0.0037 |
|           | 917    | 1.353  | 0.0028 |             | 1007   | 1.23   | 0.0023 |
|           | 906    | 1.369  | 0.0009 |             |        |        |        |

| Continuation |        |        |        |             |        |        |        |
|--------------|--------|--------|--------|-------------|--------|--------|--------|
| $q = 0$      |        |        |        | $q = +1$    |        |        |        |
| Specie       | E (nm) | E (eV) | OOS    | Specie      | E (nm) | E (eV) | OOS    |
|              | 1196   | 1.04   | 0.0002 |             | 1329   | 0.93   | 0.0037 |
|              | 1102   | 1.13   | 0.0001 |             | 1173   | 1.06   | 0.0005 |
| <b>3e</b>    | 1043   | 1.19   | 0.0044 | <b>3e-c</b> | 1108   | 1.12   | 0.0028 |
|              | 922    | 1.35   | 0.0040 |             | 958    | 1.29   | 0.0093 |
|              | 907    | 1.37   | 0.0019 |             |        |        |        |
|              | 1184   | 1.05   | 0.0033 |             | 1322   | 0.94   | 0.0027 |
|              | 1056   | 1.17   | 0.0016 |             | 1094   | 1.13   | 0.0054 |
| <b>3f</b>    | 975    | 1.27   | 0.0019 | <b>3f-c</b> | 1088   | 1.14   | 0.0039 |
|              | 960    | 1.29   | 0.0001 |             |        |        |        |
|              | 931    | 1.33   | 0.0040 |             |        |        |        |

**Table S8** Wavelength (nm), energy (eV) and optical oscillator strength (OOS) of the first electronic transitions of  $C_{60}H_4^+$  ( $q = +1$ ) isomers obtained at  $r^2$ SCAN/def2-TZVP level.

| $q = +1$    |        |        |        |             |        |        |        |
|-------------|--------|--------|--------|-------------|--------|--------|--------|
| Specie      | E (nm) | E (eV) | OOS    | Specie      | E (nm) | E (eV) | OOS    |
|             | 3436   | 0.36   | 0.0017 |             | 3016   | 0.41   | 0.0000 |
|             | 3087   | 0.40   | 0.0000 |             | 2619   | 0.47   | 0.0024 |
| <b>4a-c</b> | 1899   | 0.65   | 0.0042 | <b>4g-c</b> | 2395   | 0.52   | 0.0038 |
|             | 1661   | 0.75   | 0.0024 |             | 1443   | 0.86   | 0.0014 |
|             | 960    | 1.29   | 0.0015 |             | 1036   | 1.20   | 0.0118 |
|             | 3223   | 0.38   | 0.0006 |             | 2155   | 0.58   | 0.0015 |
|             | 2394   | 0.52   | 0.0018 |             | 1787   | 0.69   | 0.0010 |
|             | 1900   | 0.65   | 0.0000 |             | 1386   | 0.89   | 0.0003 |
| <b>4b-c</b> | 1248   | 0.99   | 0.0049 | <b>4h-c</b> | 1322   | 0.94   | 0.0024 |
|             | 907    | 1.37   | 0.0263 |             | 1089   | 1.14   | 0.0011 |
|             |        |        |        |             | 1041   | 1.19   | 0.0002 |
|             |        |        |        |             | 949    | 1.31   | 0.0001 |
|             |        |        |        |             | 904    | 1.37   | 0.0011 |
|             | 3442   | 0.36   | 0.0000 |             | 5009   | 0.25   | 0.0003 |
|             | 3358   | 0.37   | 0.0000 |             | 3134   | 0.40   | 0.0006 |
| <b>4c-c</b> | 2618   | 0.47   | 0.0000 | <b>4i-c</b> | 2114   | 0.59   | 0.0025 |
|             | 1554   | 0.80   | 0.0168 |             | 1712   | 0.72   | 0.0036 |
|             |        |        |        |             | 1333   | 0.93   | 0.0022 |
|             |        |        |        |             | 938    | 1.32   | 0.0109 |

| Continuation |        |        |        |             |        |        |        |
|--------------|--------|--------|--------|-------------|--------|--------|--------|
| $q = +1$     |        |        |        |             |        |        |        |
| Specie       | E (nm) | E (eV) | OOS    | Specie      | E (nm) | E (eV) | OOS    |
|              | 3829   | 0.32   | 0.0000 |             | 4040   | 0.31   | 0.0005 |
|              | 3096   | 0.40   | 0.0002 |             | 3268   | 0.38   | 0.0013 |
| <b>4d-c</b>  | 1895   | 0.65   | 0.0012 | <b>4j-c</b> | 2159   | 0.57   | 0.0002 |
|              | 1449   | 0.86   | 0.0016 |             | 1596   | 0.78   | 0.0029 |
|              | 1339   | 0.93   | 0.0096 |             | 1321   | 0.94   | 0.0124 |
|              |        |        |        |             | 956    | 1.30   | 0.0060 |
|              | 2575   | 0.48   | 0.0000 |             | 2221   | 0.56   | 0.0026 |
|              | 2224   | 0.56   | 0.0023 |             | 2081   | 0.60   | 0.0014 |
|              | 1881   | 0.66   | 0.0029 |             | 1575   | 0.79   | 0.0017 |
| <b>4e-c</b>  | 1208   | 1.03   | 0.0003 | <b>4k-c</b> | 1170   | 1.06   | 0.0066 |
|              | 1197   | 1.04   | 0.0051 |             | 1077   | 1.15   | 0.0073 |
|              | 1017   | 1.22   | 0.0025 |             | 972    | 1.28   | 0.0038 |
|              |        |        |        |             | 902    | 1.38   | 0.0012 |
|              | 3112   | 0.40   | 0.0015 |             |        |        |        |
|              | 2561   | 0.48   | 0.0005 |             |        |        |        |
| <b>4f-c</b>  | 1819   | 0.68   | 0.0025 |             |        |        |        |
|              | 1332   | 0.93   | 0.0015 |             |        |        |        |
|              | 1074   | 1.15   | 0.0076 |             |        |        |        |



**S7 Ionization potentials****Table S9** Ionization potentials (IP) of C<sub>60</sub>H<sub>2</sub>, C<sub>60</sub>H<sub>3</sub> and C<sub>60</sub>H<sub>4</sub> species obtained at B3LYP-D3/def2-TZVP level.

| Specie     | IP (eV) |
|------------|---------|
| 2a         | 7.03    |
| 2b         | 7.04    |
| 2c         | 6.70    |
| 2d         | 6.70    |
| Mean value | 6.87    |
| 3a         | 6.40    |
| 3b         | 6.30    |
| 3c         | 6.36    |
| 3d         | 6.36    |
| 3e         | 6.30    |
| 3f         | 6.32    |
| Mean value | 6.34    |
| 4a         | 6.82    |
| 4b         | 6.77    |
| 4c         | 6.84    |
| 4d         | 6.88    |
| 4e         | 6.84    |
| 4f         | 6.87    |
| 4g         | -       |
| 4h         | 6.63    |
| 4i         | 6.79    |
| 4j         | 6.74    |
| 4k         | -       |
| Mean value | 6.80    |

## S8 Property trends

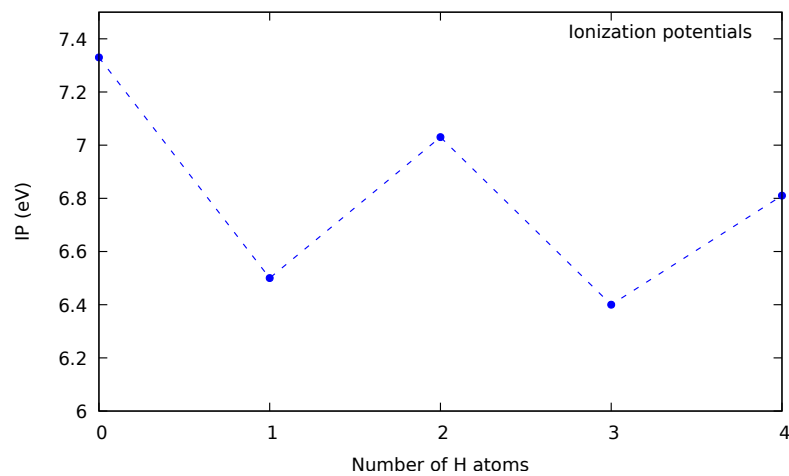

**Figure S15** Ionization potentials in function of number of hydrogen atoms.

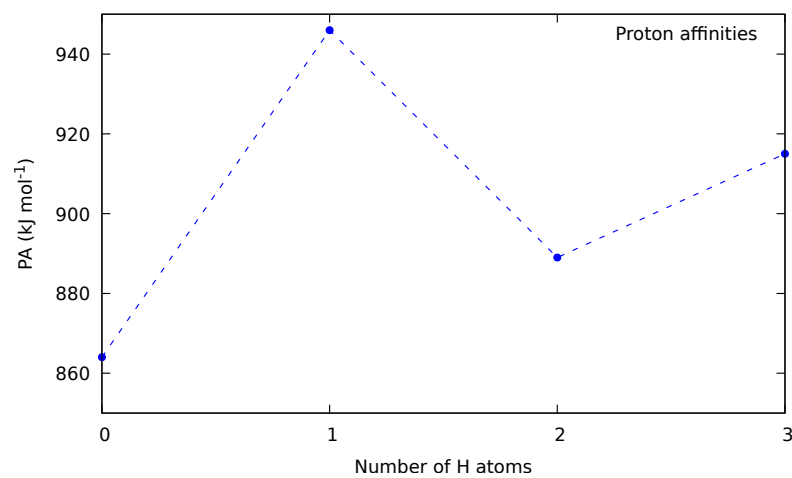

**Figure S16** Proton affinities in function of number of hydrogen atoms.

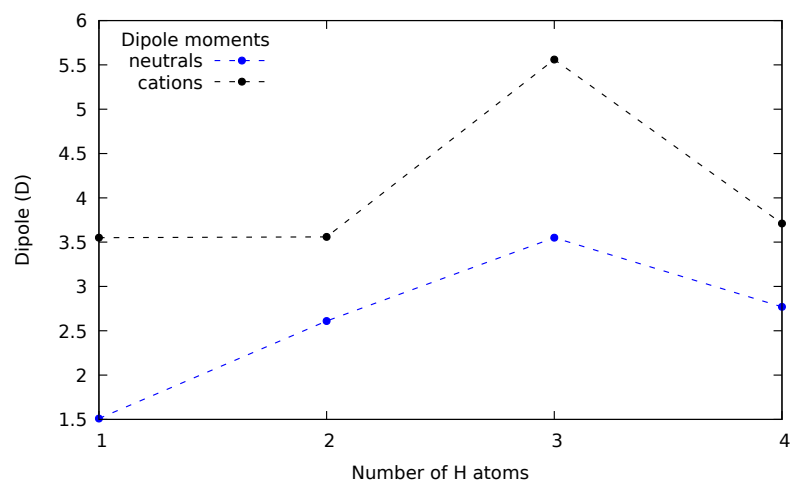

**Figure S17** Dipole moments in function of number of hydrogen atoms.

## References

- [1] K. Yamamoto, M. Saunders, A. Khong, R. J. Cross, M. Grayson, M. L. Gross, A. F. Benedetto and R. B. Weisman, *Journal of the American Chemical Society*, 1999, **121**, 1591–1596.
- [2] D. Strelnikov, B. Kern and M. M. Kappes, *Astronomy & Astrophysics*, 2015, **584**, A55.
- [3] J. Palotás, J. Martens, G. Berden and J. Oomens, *Nature Astronomy*, 2020, **4**, 240–245.
- [4] S. Leach, M. Vervloet, A. Desprès, E. Bréheret, J. P. Hare, T. John Dennis, H. W. Kroto, R. Taylor and D. R. Walton, *Chemical Physics*, 1992, **160**, 451–466.
- [5] C. C. Henderson and P. A. Cahill, *Science*, 1993, **259**, 1885–1887.
- [6] R. Bensasson, E. Bienvenue, J.-M. Janot, S. Leach, P. Seta, D. Schuster, S. Wilson and H. Zhao, *Chemical Physics Letters*, 1995, **245**, 566–570.
- [7] A. O. Lykhin, S. Ahmadvand and S. A. Varganov, *Journal of Physical Chemistry Letters*, 2019, **10**, 115–120.
- [8] J. Soler, R. Sarkar and M. Boggio-Pasqua, *The Journal of Physical Chemistry A*, 2019, **123**, 1824–1829.
